# Supplementary material for: DArT Markers Effectively Target Gene Space in the Rye Genome
Source: Front Plant Sci. 2016 Oct 26;7:1600. doi: 10.3389/fpls.2016.01600 (PMC5080361; doi:10.3389/fpls.2016.01600)
Supplement: TABLE S1 — List of DArT sequence IDs. [file Table_1.XLSX]

## Sheet: 6177DArTcloneIDs
DArTclone ID	marker name	non-redundant sequence ID/contig membership	source*
63414	wPt-4515	63414	3
63450	wPt-3865	63450	3
63482	wPt-4757	63482	3
63579	wPt-0654	63579	2
63588	wPt-8731	506584_con	2
63683	wPt-6555	399639_con	3
63687	wPt-5877	63687	3
63710	wPt-9368	63710	1
63719	wPt-2276	63719	3
63734	wPt-8530	505303_con	1
66443	wPt-2579	66443	3
66451	wPt-1470	509630_con	1
66466	wPt-6418	66466	1
66482	wPt-4925	66482_con	1
66512	wPt-9820	66512_con	3
66560	wPt-1505	66560	1
66584	wPt-4824	66584_con	2
66612	wPt-6933	402165_con	1
66654	wPt-3973	66654	1
66656	wPt-2843	66584_con	1
66663	wPt-8681	66663	2
66668	wPt-6466	66668	1
66674	wPt-3302	66674	1
66766	wPt-6821	66766	1
66797	wPt-3533	66797	3
115202	wPt-4898	115202	3
115291	wPt-7200	115291	3
115333	wPt-2644	115333	3
115342	wPt-8135	115342_con	2
115379	wPt-4748	507570_con	2
115412	wPt-6002	115412	3
115427	wPt-9057	115427	2
115453	wPt-3462	115453	3
115472	wPt-0950	115472	2
115509	wPt-9306	115509	3
115520	wPt-9467	115520	3
115559	wPt-1062	115559	3
115566	wPt-2410	115566	2
115570	wPt-2882	115570	3
115612	wPt-0032	115612	2
115622	wPt-9418	115622	3
115727	wPt-9082	115727	3
115752	wPt-6105	115752	3
115779	wPt-2544	115779	3
115780	wPt-1959	115780_con	3
115781	wPt-6170	115780_con	3
115782	wPt-5852	115782	3
115783	wPt-5810	115783	2
115784	wPt-6069	115784_con	2
115803	wPt-5145	115803	3
115804	wPt-2965	115804	3
115806	wPt-5629	115806	3
115808	wPt-6228	115784_con	3
115814	wPt-5532	115814	2
115861	wPt-8250	115861	2
115995	wPt-3395	115995	2
115998	wPt-0299	115998	2
116035	wPt-3025	116035	2
116080	wPt-0522	116080	3
116174	wPt-0994	116174	3
116196	wPt-9244	116196	3
116220	wPt-3484	116220_con	2
116247	wPt-6752	116247	3
116273	wPt-0775	116273	2
116288	wPt-6485	116288	3
116320	wPt-3581	116320	3
116344	wPt-9881	116344	2
116388	wPt-9397	116388	2
116405	wPt-5172	116405	2
116498	wPt-9118	116498	3
116543	wPt-8760	116543	2
116612	wPt-7015	116612	3
116632	wPt-1590	116632	3
116665	wPt-4049	116665_con	3
116686	wPt-3503	116686	2
116727	wPt-6141	116727	3
116790	wPt-5659	116790	3
116809	wPt-4487	116809	2
116910	wPt-0047	116910	2
116930	wPt-5069	116930_con	3
116979	wPt-3939	116979	2
117025	wPt-7576	117025	3
117080	wPt-1533	116930_con	2
117100	wPt-8814	117100	3
117197	wPt-117197	117197	1
117250	wPt-117250	117250	1
117252	wPt-5192	398627_con	3
117257	wPt-117257	117257	1
117260	wPt-117260	390096_con	1
117324	wPt-7796	117324_con	2
117358	wPt-117358	389933_con	1
117472	wPt-3094	117472	3
119477	wPt-3149	119477	3
119497	wPt-7127	119497	2
119514	wPt-4412	119514	2
119594	wPt-3256	119594_con	3
119605	wPt-2604	119605	2
119649	wPt-7072	119649	2
119651	wPt-4890	115780_con	3
119657	wPt-0711	119657_con	3
119718	wPt-9710	119718	3
119746	wPt-7267	119746	2
119926	wPt-0626	390071_con	1
119960	wPt-3904	119960	2
120000	wPt-9095	401284_con	3
120054	wPt-1189	120054_con	2
120078	wPt-0349	120078	3
120081	wPt-5414	120081	1
120119	wPt-7988	120119	1
120175	wPt-7498	66512_con	2
120183	wPt-6806	120183	2
120194	wPt-7888	120194	3
120247	wPt-3261	120247	2
120324	wPt-1645	120324	3
120394	wPt-6426	120394_con	3
120407	wPt-5722	120407	2
120450	wPt-4130	66512_con	3
120549	wPt-1699	120549	3
120754	wPt-0058	400398_con	1
121087	wPt-4320	121087	3
121159	wPt-7476	121159	2
121163	wPt-3305	509607_con	2
121188	wPt-5980	121188	3
121400	wPt-1721	121400	3
343489	wPt-343489	343489	1
343658	wPt-343658	343658_con	1
343797	wPt-2948	343797	1
343849	wPt-343849	343849	1
343859	wPt-343859	343859	1
343877	wPt-343877	343877	1
343879	wPt-343879	345230_con	1
343885	wPt-343885	343885	1
343891	wPt-343891	401284_con	1
343910	wPt-343910	343910	1
343920	wPt-343920	343920	1
343930	wPt-6966	343930	2
343956	wPt-343956	343956	1
343959	wPt-343959	389933_con	1
344126	wPt-4087	344126_con	3
344129	wPt-1232	344126_con	3
344175	wPt-344175	115342_con	1
344179	wPt-9790	344179	2
344215	wPt-344215	344907_con	1
344231	wPt-2346	411181_con	1
344239	wPt-1507	344239	3
344263	wPt-344263	344263	1
344284	wPt-344284	344284_con	1
344295	wPt-344295	344295	1
344347	wPt-344347	344347	1
344364	wPt-344364	344364	1
344418	wPt-7765	344418	1
344420	wPt-344420	344284_con	1
344425	wPt-2563	344425	2
344431	wPt-344431	344431	1
344451	wPt-344451	344451	1
344500	wPt-344500	344500	1
344539	wPt-344539	344539	1
344568	wPt-4063	344568	3
344578	wPt-8932	344578	3
344621	wPt-344621	509232_con	1
344635	wPt-344635	344635	1
344657	wPt-344657	120054_con	1
344742	wPt-344742	507483_con	1
344764	wPt-4062	344764	1
344778	wPt-344778	344778	1
344780	wPt-344780	349351_con	1
344792	wPt-344792	344792	1
344822	wPt-344822	344822	1
344831	wPt-3289	344831	3
344906	wPt-344906	344906_con	1
344907	wPt-344907	344907_con	1
344917	wPt-5907	344917	3
344921	wPt-344921	344921	1
344965	wPt-8171	344965	2
345028	wPt-345028	345028	1
345110	wPt-0562	345110	2
345119	wPt-345119	389862_con	1
345121	wPt-345121	345121	1
345170	wPt-345170	120394_con	1
345230	wPt-345230	345230_con	1
345279	wPt-4310	345279	1
345295	wPt-3212	345295	2
345319	wPt-6829	345319	3
345374	wPt-9934	345374	3
345424	wPt-8659	345424	3
345524	wPt-0732	345524	3
345565	wPt-345565	345565	1
345664	wPt-9013	345664	3
345687	wPt-345687	345687	1
345703	wPt-345703	345703	1
345712	wPt-345712	389862_con	1
345716	wPt-345716	411103_con	1
345781	wPt-345781	389862_con	1
345787	wPt-3308	345787	3
345830	wPt-0167	345830	2
345840	wPt-345840	389973_con	1
345843	wPt-345843	345843	1
345901	wPt-345901	345901	1
345904	wPt-345904	345904	1
345962	wPt-0665	345962	3
345966	wPt-345966	345966	1
345975	wPt-345975	345975	1
345979	wPt-345979	345979	1
345995	wPt-3712	345995_con	3
346102	wPt-346102	346102	1
346131	wPt-1742	346131	3
346206	wPt-346206	346206	1
346386	wPt-3037	346386	3
346443	rPt-7002	346443	3
346519	rPt-1759	505303_con	1
346523	rPt-1767	346523_con	3
346583	rPt-6165	346583_con	3
346650	rPt-7068	507395_con	3
346676	rPt-5480	346676	1
346697	rPt-5523	346697_con	3
346701	rPt-7238	509216_con	1
346703	rPt-1177	507824_con	1
346708	rPt-3869	402420_con	1
346713	rPt-1277	346713	1
346726	rPt-5060	508843_con	1
346728	rPt-7630	346728	1
346745	rPt-9718	344906_con	1
346752	rPt-6128	346752	1
346779	rPt-9856	346779	1
346781	rPt-4156	400014_con	1
346782	rPt-4471	506896_con	3
346784	rPt-0238	346784_con	3
346808	rPt-6911	401114_con	1
346813	rPt-8049	401173_con	1
346828	rPt-9074	346828	1
346841	rPt-5619	346841	3
346851	rPt-5412	346851	1
346861	rPt-6266	347927_con	1
346862	rPt-7137	411479_con	1
346872	rPt-3106	390321_con	1
346879	rPt-0029	346879	3
346881	rPt-1348	346881_con	3
346889	rPt-4783	509054_con	1
346891	rPt-8734	507074_con	1
346892	rPt-5091	411252_con	1
346893	rPt-6200	346893	1
346894	rPt-3887	400358_con	1
346896	rPt-7570	346896	1
346908	rPt-8294	402589_con	1
346910	rPt-9196	400257_con	1
346914	rPt-6659	390679_con	1
346921	rPt-3998	389653_con	1
346936	rPt-8750	508380_con	1
346940	rPt-3699	346940	1
346946	rPt-8921	411252_con	1
346947	rPt-4378	346947	1
346949	rPt-1505	400974_con	1
346960	rPt-4246	346960_con	1
346962	rPt-4627	507427_con	1
346964	rPt-7183	346969_con	1
346969	rPt-8737	346969_con	1
346971	rPt-6710	346971	1
346975	rPt-5439	401233_con	1
346980	rPt-9178	411252_con	1
346981	rPt-5504	346981	1
346982	rPt-3556	346982	1
346984	rPt-2534	410889_con	1
347005	rPt-7385	347005	1
347011	rPt-8621	399603_con	1
347012	rPt-3623	390764_con	1
347035	rPt-6207	347035	1
347038	rPt-6792	509579_con	1
347047	rPt-0092	508703_con	1
347048	rPt-8205	347048_con	1
347054	rPt-1961	401026_con	1
347071	rPt-4691	347071_con	1
347072	rPt-4272	411252_con	1
347074	rPt-0550	399821_con	1
347082	rPt-5027	390046_con	1
347106	rPt-5822	347071_con	1
347114	rPt-5403	390442_con	1
347125	rPt-4257	509013_con	1
347128	rPt-6576	347128_con	1
347143	rPt-9706	347143	1
347149	rPt-3268	347149_con	3
347154	rPt-9220	400944_con	1
347157	rPt-1422	402165_con	1
347168	rPt-0899	347596_con	1
347172	rPt-5688	347172	1
347183	rPt-8307	506926_con	1
347184	rPt-2542	347184_con	1
347186	rPt-3533	400862_con	1
347195	rPt-3473	402643_con	1
347203	rPt-7170	507084_con	1
347212	rPt-1829	411252_con	1
347223	rPt-5341	347223	3
347224	rPt-5409	347224	1
347235	rPt-8589	411479_con	1
347245	rPt-6281	401849_con	1
347246	rPt-3206	506070_con	1
347256	rPt-4415	509054_con	1
347257	rPt-0049	347257	1
347272	rPt-2548	347272	1
347295	rPt-7906	347295	3
347296	rPt-7200	506584_con	1
347301	rPt-9239	509013_con	1
347302	rPt-2304	347302	1
347307	rPt-7156	389853_con	1
347322	rPt-4269	401561_con	1
347323	rPt-3422	347323	1
347325	rPt-5429	400538_con	1
347335	rPt-7987	347335_con	3
347340	rPt-6603	347661_con	1
347352	rPt-3738	505640_con	1
347356	rPt-3030	347356	1
347362	rPt-7947	506584_con	1
347371	rPt-7213	347371	1
347390	rPt-3244	509064_con	1
347391	rPt-1737	505654_con	1
347395	rPt-4199	347395	3
347406	rPt-6769	506618_con	1
347412	rPt-9132	401233_con	1
347413	rPt-2311	389649_con	1
347448	rPt-9005	401976_con	1
347454	rPt-5995	411252_con	1
347470	rPt-6223	401976_con	1
347492	rPt-3835	347492	1
347528	rPt-8185	507074_con	1
347534	rPt-9258	402215_con	1
347536	rPt-6980	389927_con	3
347547	rPt-0615	390158_con	1
347559	rPt-8399	347559	3
347562	rPt-8698	347562	1
347574	rPt-5179	347574_con	1
347587	rPt-1579	347587_con	1
347590	rPt-3136	347590	1
347593	rPt-8933	389256_con	1
347596	rPt-7628	347596_con	1
347607	rPt-7872	347607	1
347640	rPt-4583	346969_con	3
347652	rPt-7348	347652	1
347661	rPt-4601	347661_con	1
347664	rPt-7881	347664	1
347665	rPt-6124	347665	1
347698	rPt-6661	347698_con	1
347702	rPt-2478	347335_con	3
347726	rPt-9131	411479_con	1
347738	rPt-9265	509420_con	1
347745	rPt-6091	389348_con	1
347746	rPt-0947	347746	1
347750	rPt-3638	506457_con	1
347758	rPt-1807	347758	1
347763	rPt-0043	347763	1
347770	rPt-0709	347770	3
347771	rPt-1002	347771	1
347784	rPt-2544	399937_con	1
347789	rPt-6069	508866_con	1
347800	rPt-8477	347800	1
347808	rPt-5145	399876_con	1
347809	rPt-2965	411252_con	1
347814	rPt-0857	398784_con	1
347831	rPt-7349	349351_con	1
347845	rPt-0996	508477_con	3
347856	rPt-2672	347856_con	1
347871	rPt-6029	347871	1
347874	rPt-1723	401173_con	1
347901	rPt-3933	401610_con	1
347925	rPt-0760	347925	1
347927	rPt-3295	347927_con	1
347933	rPt-7609	347933	1
347940	rPt-4778	390532_con	1
347942	rPt-8149	389256_con	1
347944	rPt-7608	390426_con	1
347960	rPt-9914	508543_con	1
347965	rPt-8043	347965	1
347967	rPt-8987	507661_con	1
347969	rPt-3332	347969_con	1
347998	tPt-8940	410783_con	1
348007	tPt-7975	348007_con	1
348042	tPt-1893	348042	1
348082	tPt-9897	389771_con	1
348093	tPt-1221	348093	1
348117	tPt-8966	390674_con	1
348128	tPt-7135	348128	1
348133	tPt-9884	348133	1
348182	tPt-9049	348182	1
348220	tPt-9839	348220	1
348234	tPt-4125	348234	1
348258	tPt-8896	348258	1
348262	tPt-5060	348262	1
348279	tPt-4657	348279	1
348293	tPt-1713	389984_con	1
348324	tPt-8978	348324	1
348360	tPt-3630	348360_con	1
348373	tPt-7559	398796_con	1
348374	tPt-6353	401284_con	1
348380	tPt-8051	348380_con	3
348395	tPt-0055	509384_con	1
348408	tPt-3106	348408	1
348410	tPt-3792	348410	1
348429	tPt-6200	401114_con	1
348431	tPt-8117	348431	1
348443	tPt-8302	348443	1
348477	tPt-5796	400270_con	1
348489	tPt-9086	348489	1
348507	tPt-6710	348507_con	3
348529	tPt-7643	348529	1
348550	tPt-5537	348550	1
348564	tPt-4848	115342_con	1
348577	tPt-9180	348577	1
348609	tPt-0602	348609	3
348622	tPt-8771	400572_con	1
348626	tPt-0091	348360_con	1
348648	tPt-3980	400221_con	1
348688	tPt-9920	348688	1
348707	tPt-1940	348707	1
348736	tPt-1611	400572_con	1
348747	tPt-3774	348747	1
348754	tPt-4886	348754	1
348817	tPt-5234	348817	1
348866	tPt-3575	348866	1
348963	tPt-4129	509658_con	1
348981	tPt-7586	348981	3
349009	tPt-4628	349009	1
349063	tPt-5129	344906_con	1
349151	tPt-7724	345995_con	3
349166	tPt-5381	349166_con	1
349205	tPt-7900	349205	1
349226	tPt-4626	349226	1
349241	tPt-8910	349241	1
349246	tPt-0619	349246	1
349269	tPt-4479	349269	1
349271	tPt-1112	349271	1
349281	tPt-6091	389953_con	3
349283	tPt-4576	349283	1
349319	tPt-2425	349166_con	1
349332	tPt-5290	349332	1
349343	tPt-3746	398784_con	1
349351	tPt-8002	349351_con	1
349362	tPt-3320	508767_con	1
349370	tPt-2408	349370	1
349394	tPt-1999	349394_con	1
349430	tPt-0396	349430	1
349433	tPt-1377	509420_con	1
349474	tPt-7561	399429_con	1
372365	wPt-11942	372365	1
372403	wPt-2999	372403_con	2
372434	wPt-11939	372434	1
372435	wPt-11727	372435	1
372479	wPt-5347	372479	3
372637	wPt-11732	372637	1
372662	wPt-11814	372662	1
372676	wPt-11739	66482_con	1
372689	wPt-11879	372689	1
372720	wPt-3582	372403_con	3
389254	rPt-389254	389254_con	1
389255	rPt-389255	389255_con	1
389256	rPt-389256	389256_con	1
389258	rPt-389258	389258_con	1
389259	rPt-389259	389259	1
389260	rPt-389260	389260	1
389261	rPt-389261	389261	1
389262	rPt-389262	389262_con	1
389264	rPt-389264	389264	1
389266	rPt-389266	389266_con	1
389268	rPt-389268	389268_con	1
389270	rPt-389270	400234_con	1
389272	rPt-389272	389272	1
389274	rPt-389274	389274	1
389275	rPt-389275	389275	1
389276	rPt-389276	399352_con	1
389277	rPt-389277	389277	1
389281	rPt-389281	389281_con	1
389282	rPt-389282	389282_con	1
389283	rPt-389283	389283	1
389289	rPt-389289	509249_con	1
389290	rPt-389290	507234_con	1
389293	rPt-389293	389293	1
389294	rPt-389294	389294_con	1
389301	rPt-389301	401976_con	1
389303	rPt-389303	389303_con	1
389304	rPt-389304	389304_con	1
389305	rPt-389305	389305	1
389306	rPt-389306	509027_con	1
389307	rPt-389307	389307_con	1
389308	rPt-389308	389308	1
389309	rPt-389309	389309_con	1
389311	rPt-389311	389311_con	1
389313	rPt-389313	505591_con	1
389316	rPt-389316	389316	1
389317	rPt-389317	389317_con	1
389319	rPt-389319	389319_con	1
389320	rPt-389320	400236_con	1
389322	rPt-389322	389322_con	1
389324	rPt-389324	389324	1
389327	rPt-389327	389327	1
389328	rPt-389328	389328_con	1
389329	rPt-389329	389329_con	1
389330	rPt-389330	389330	1
389332	rPt-389332	389332	1
389333	rPt-389333	389333	1
389336	rPt-389336	389336	1
389338	rPt-389338	389338	1
389342	rPt-389342	389342_con	1
389344	rPt-389344	400884_con	1
389346	rPt-389346	389346	1
389348	rPt-389348	389348_con	1
389350	rPt-389350	400702_con	1
389353	rPt-389353	389353	1
389355	rPt-389355	508285_con	1
389356	rPt-389356	389356	1
389357	rPt-389357	389357	1
389359	rPt-389359	389359	1
389360	rPt-389360	389360	1
389362	rPt-389362	389373_con	1
389363	rPt-389363	389363	1
389367	rPt-389367	399743_con	1
389369	rPt-389369	389369	1
389370	rPt-389370	389266_con	1
389372	rPt-389372	389372_con	1
389373	rPt-389373	389373_con	1
389374	rPt-389374	389374	1
389375	rPt-389375	389375_con	1
389377	rPt-389377	509522_con	1
389378	rPt-389378	389378_con	1
389382	rPt-389382	389382	1
389383	rPt-389383	389383	1
389384	rPt-389384	389384_con	1
389385	rPt-389385	389385_con	1
389391	rPt-389391	389391_con	1
389392	rPt-389392	389392	1
389394	rPt-389394	389394_con	1
389395	rPt-389395	389395_con	1
389396	rPt-389396	509522_con	1
389399	rPt-389399	389399_con	1
389402	rPt-389402	389402	1
389403	rPt-389403	389403_con	1
389408	rPt-389408	389408_con	1
389411	rPt-389411	505618_con	1
389413	rPt-389413	389413_con	1
389414	rPt-389414	389414_con	1
389415	rPt-389415	389415	1
389418	rPt-389418	389418	1
389421	rPt-389421	346697_con	1
389424	rPt-389424	389424	1
389427	rPt-389427	399743_con	1
389428	rPt-389428	389428_con	1
389434	rPt-389434	389434	1
389435	rPt-389435	389435_con	1
389437	rPt-389437	389437	1
389438	rPt-389438	389438_con	1
389439	rPt-389439	507398_con	1
389441	rPt-389441	505357_con	1
389445	rPt-389445	389445	1
389446	rPt-389446	389446_con	1
389448	rPt-389448	389448_con	1
389450	rPt-389450	402232_con	1
389453	rPt-389453	389453	1
389454	rPt-389454	389454_con	1
389455	rPt-389455	389455	1
389457	rPt-389457	389457_con	1
389459	rPt-389459	389459	1
389460	rPt-389460	389460_con	1
389461	rPt-389461	411479_con	1
389462	rPt-389462	509402_con	1
389465	rPt-389465	389465	1
389466	rPt-389466	389466_con	1
389467	rPt-389467	401853_con	1
389468	rPt-389468	389468_con	1
389469	rPt-389469	389469	1
389471	rPt-389471	399549_con	1
389472	rPt-389472	389472_con	1
389473	rPt-389473	389473	1
389474	rPt-389474	389474_con	1
389488	rPt-389488	508866_con	1
389495	rPt-389495	389256_con	1
389496	rPt-389496	389496	1
389497	rPt-389497	389497	1
389500	rPt-389500	389500	1
389501	rPt-389501	400535_con	1
389507	rPt-389507	389507	1
389511	rPt-389511	506962_con	1
389514	rPt-389514	389514_con	1
389515	rPt-389515	389515_con	1
389517	rPt-389517	389517	1
389519	rPt-389519	389519	1
389523	rPt-389523	509472_con	1
389525	rPt-389525	389525_con	1
389527	rPt-389527	389527	1
389529	rPt-389529	411391_con	1
389530	rPt-389530	389530_con	1
389533	rPt-389533	389533_con	1
389538	rPt-389538	400358_con	1
389539	rPt-389539	508762_con	1
389540	rPt-389540	389540_con	1
389541	rPt-389541	389541	1
389544	rPt-389544	389544_con	1
389545	rPt-389545	389545_con	1
389546	rPt-389546	411155_con	1
389552	rPt-389552	389552	1
389556	rPt-389556	389556	1
389559	rPt-389559	389559	1
389562	rPt-389562	389562	1
389567	rPt-389567	389567_con	1
389568	rPt-389568	389568	1
389569	rPt-389569	389569	1
389570	rPt-389570	389570	1
389573	rPt-389573	508765_con	1
389576	rPt-389576	509061_con	1
389585	rPt-389585	389585_con	1
389588	rPt-389588	389588_con	1
389590	rPt-389590	390527_con	1
389593	rPt-389593	402572_con	1
389594	rPt-389594	389594	1
389596	rPt-389596	389596	1
389598	rPt-389598	389598	1
389599	rPt-389599	389599_con	1
389600	rPt-389600	389600	1
389602	rPt-389602	389602_con	1
389603	rPt-389603	389603	1
389607	rPt-389607	389607	1
389608	rPt-389608	389608	1
389610	rPt-389610	389610	1
389611	rPt-389611	411373_con	1
389612	rPt-389612	389612	1
389616	rPt-389616	389616_con	1
389617	rPt-389617	389617_con	1
389619	rPt-389619	389619	1
389621	rPt-389621	389621_con	1
389622	rPt-389622	389622	1
389626	rPt-389626	389626	1
389627	rPt-389627	389627	1
389628	rPt-389628	389628	1
389631	rPt-389631	389544_con	1
389635	rPt-389635	389635	1
389638	rPt-389638	402572_con	1
389639	rPt-389639	389639_con	1
389640	rPt-389640	507764_con	1
389643	rPt-389643	389643_con	1
389647	rPt-389647	389256_con	1
389648	rPt-389648	509232_con	1
389649	rPt-389649	389649_con	1
389650	rPt-389650	399541_con	1
389652	rPt-389652	389652_con	1
389653	rPt-389653	389653_con	1
389656	rPt-389656	401346_con	1
389657	rPt-389657	389657	1
389659	rPt-389659	389659_con	1
389660	rPt-389660	389660	1
389663	rPt-389663	400974_con	1
389664	rPt-389664	389664_con	1
389665	rPt-389665	389665	1
389667	rPt-389667	389667_con	1
389668	rPt-389668	389667_con	1
389669	rPt-389669	389669	1
389670	rPt-389670	400535_con	1
389677	rPt-389677	401799_con	1
389678	rPt-389678	505512_con	1
389683	rPt-389683	508312_con	1
389687	rPt-389687	389687	1
389689	rPt-389689	389373_con	1
389690	rPt-389690	389690	1
389691	rPt-389691	389691	1
389693	rPt-389693	389693	1
389694	rPt-389694	389694_con	1
389696	rPt-389696	389696_con	1
389699	rPt-389699	389699_con	1
389703	rPt-389703	505340_con	1
389704	rPt-389704	389704	1
389705	rPt-389705	389705	1
389706	rPt-389706	389706	1
389708	rPt-389708	398786_con	1
389709	rPt-389709	389709	1
389711	rPt-389711	389711_con	1
389712	rPt-389712	389712	1
389714	rPt-389714	509027_con	1
389715	rPt-389715	389715	1
389717	rPt-389717	390017_con	1
389718	rPt-389718	389718_con	1
389719	rPt-389719	389719	1
389722	rPt-389722	389722_con	1
389723	rPt-389723	389723	1
389724	rPt-389724	400849_con	1
389726	rPt-389726	389726	1
389728	rPt-389728	389728	1
389730	rPt-389730	389730	1
389731	rPt-389731	389731_con	1
389733	rPt-389733	389733	1
389735	rPt-389735	389735	1
389740	rPt-389740	389740	1
389741	rPt-389741	390734_con	1
389745	rPt-389745	389384_con	1
389746	rPt-389746	389746	1
389748	rPt-389748	508600_con	1
389750	rPt-389750	389750_con	1
389753	rPt-389753	389753_con	1
389754	rPt-389754	389882_con	1
389759	rPt-389759	389759	1
389763	rPt-389763	402590_con	1
389765	rPt-389765	389765	1
389770	rPt-389770	389770	1
389771	rPt-389771	389771_con	1
389772	rPt-389772	509509_con	1
389776	rPt-389776	389776	1
389777	rPt-389777	389777_con	1
389781	rPt-389781	401906_con	1
389782	rPt-389782	389266_con	1
389783	rPt-389783	400985_con	1
389785	rPt-389785	389785	1
389787	rPt-389787	389787	1
389788	rPt-389788	389788_con	1
389793	rPt-389793	411155_con	1
389803	rPt-389803	389803_con	1
389806	rPt-389806	389281_con	1
389808	rPt-389808	389808_con	1
389810	rPt-389810	389810	1
389812	rPt-389812	410779_con	1
389814	rPt-389814	507439_con	1
389815	rPt-389815	389454_con	1
389823	rPt-389823	389823_con	1
389825	rPt-389825	508746_con	1
389827	rPt-389827	506618_con	1
389828	rPt-389828	389828	1
389829	rPt-389829	389829	1
389833	rPt-389833	389833	1
389837	rPt-389837	389317_con	1
389838	rPt-389838	389545_con	1
389839	rPt-389839	389839_con	1
389845	rPt-389845	389372_con	1
389848	rPt-389848	389848	1
389851	rPt-389851	389851_con	1
389853	rPt-389853	389853_con	1
389856	rPt-389856	389856_con	1
389858	rPt-389858	389858_con	1
389859	rPt-389859	389859	1
389861	rPt-389861	389861	1
389862	rPt-389862	389862_con	1
389863	rPt-389863	507074_con	1
389864	rPt-389864	389864	1
389868	rPt-389868	389868_con	1
389872	rPt-389872	389872_con	1
389875	rPt-389875	389875_con	1
389881	rPt-389881	400270_con	1
389882	rPt-389882	389882_con	1
389883	rPt-389883	389883	1
389887	rPt-389887	401574_con	1
389889	rPt-389889	507796_con	1
389891	rPt-389891	389891	1
389895	rPt-389895	389895_con	1
389905	rPt-389905	389905	1
389906	rPt-389906	389906	1
389907	rPt-389907	389907_con	1
389911	rPt-389911	402491_con	1
389912	rPt-389912	410782_con	1
389913	rPt-389913	507427_con	1
389914	rPt-389914	400907_con	1
389915	rPt-389915	389915	1
389917	rPt-389917	389917_con	1
389918	rPt-389918	389918	1
389920	rPt-389920	390422_con	1
389921	rPt-389921	389921_con	1
389922	rPt-389922	389922_con	1
389925	rPt-389925	389925	1
389926	rPt-389926	389926	1
389927	rPt-389927	389927_con	1
389928	rPt-389928	389928	1
389930	rPt-389930	389930	1
389931	rPt-389931	389931	1
389933	rPt-389933	389933_con	1
389935	rPt-389935	505810_con	1
389936	rPt-389936	402491_con	1
389940	rPt-389940	389940	1
389941	rPt-389941	507074_con	1
389945	rPt-389945	389945	1
389946	rPt-389946	389946_con	1
389949	rPt-389949	509076_con	1
389951	rPt-389951	389951_con	1
389952	rPt-389952	389952_con	1
389953	rPt-389953	389953_con	1
389959	rPt-389959	389959_con	1
389963	rPt-389963	389963_con	1
389969	rPt-389969	116665_con	1
389972	rPt-389972	389972	1
389973	rPt-389973	389973_con	1
389974	rPt-389974	389862_con	1
389975	rPt-389975	410827_con	1
389977	rPt-389977	389977_con	1
389978	rPt-389978	507138_con	1
389980	rPt-389980	389980_con	1
389984	rPt-389984	389984_con	1
389987	rPt-389987	507459_con	1
389989	rPt-389989	389989	1
389990	rPt-389990	411425_con	1
389991	rPt-389991	389991	1
390002	rPt-390002	389980_con	1
390006	rPt-390006	390006	1
390007	rPt-390007	506836_con	1
390008	rPt-390008	390008	1
390009	rPt-390009	390009_con	1
390010	rPt-390010	390010	1
390013	rPt-390013	390013	1
390014	rPt-390014	390014_con	1
390016	rPt-390016	390016	1
390017	rPt-390017	390017_con	1
390018	rPt-390018	389303_con	1
390020	rPt-390020	401284_con	1
390022	rPt-390022	390022	1
390030	rPt-390030	390030_con	1
390031	rPt-390031	390031	1
390033	rPt-390033	390033	1
390035	rPt-390035	390035	1
390046	rPt-390046	390046_con	1
390047	rPt-390047	410792_con	1
390050	rPt-390050	389474_con	1
390051	rPt-390051	390051	1
390052	rPt-390052	390052	1
390055	rPt-390055	390055_con	1
390056	rPt-390056	390056	1
390057	rPt-390057	390057	1
390058	rPt-390058	390058_con	1
390060	rPt-390060	389616_con	1
390061	rPt-390061	390061	1
390063	rPt-390063	508352_con	1
390065	rPt-390065	390065	1
390070	rPt-390070	390070_con	1
390071	rPt-390071	390071_con	1
390074	rPt-390074	390074	1
390076	rPt-390076	390076	1
390077	rPt-390077	390077_con	1
390079	rPt-390079	390079_con	1
390080	rPt-390080	401723_con	1
390082	rPt-390082	390082	1
390083	rPt-390083	390083_con	1
390084	rPt-390084	401861_con	1
390088	rPt-390088	399743_con	1
390089	rPt-390089	390089	1
390090	rPt-390090	389309_con	1
390091	rPt-390091	390091_con	1
390093	rPt-390093	401974_con	1
390094	rPt-390094	390094	1
390096	rPt-390096	390096_con	1
390101	rPt-390101	390101_con	1
390103	rPt-390103	390103	1
390105	rPt-390105	390105_con	1
390106	rPt-390106	390106_con	1
390107	rPt-390107	390107_con	1
390109	rPt-390109	390109	1
390112	rPt-390112	390112	1
390113	rPt-390113	390113	1
390114	rPt-390114	390114	1
390125	rPt-390125	400270_con	1
390129	rPt-390129	390129	1
390134	rPt-390134	390134	1
390135	rPt-390135	505181_con	1
390137	rPt-390137	390679_con	1
390140	rPt-390140	390140	1
390143	rPt-390143	509324_con	1
390144	rPt-390144	390144	1
390149	rPt-390149	390152_con	1
390151	rPt-390151	390151	1
390152	rPt-390152	390152_con	1
390153	rPt-390153	410904_con	1
390156	rPt-390156	507076_con	1
390157	rPt-390157	508272_con	1
390158	rPt-390158	390158_con	1
390161	rPt-390161	390161_con	1
390163	rPt-390163	390163	1
390168	rPt-390168	390168	1
390171	rPt-390171	390171	1
390173	rPt-390173	401554_con	1
390174	rPt-390174	400235_con	1
390177	rPt-390177	506896_con	1
390180	rPt-390180	389446_con	1
390184	rPt-390184	390184_con	1
390186	rPt-390186	390186	1
390190	rPt-390190	390190_con	1
390191	rPt-390191	390191	1
390192	rPt-390192	389373_con	1
390196	rPt-390196	390196	1
390199	rPt-390199	390199_con	1
390203	rPt-390203	390203	1
390208	rPt-390208	390208	1
390211	rPt-390211	411068_con	1
390218	rPt-390218	390218	1
390220	rPt-390220	390220_con	1
390221	rPt-390221	508369_con	1
390222	rPt-390222	390331_con	1
390223	rPt-390223	390223	1
390225	rPt-390225	390225	1
390227	rPt-390227	390227_con	1
390228	rPt-390228	509513_con	1
390232	rPt-390232	390232	1
390233	rPt-390233	390233_con	1
390235	rPt-390235	390235	1
390236	rPt-390236	390236	1
390238	rPt-390238	507395_con	1
390242	rPt-390242	390527_con	1
390243	rPt-390243	390243	1
390245	rPt-390245	390245_con	1
390251	rPt-390251	390251	1
390252	rPt-390252	400789_con	1
390254	rPt-390254	390254_con	1
390257	rPt-390257	390257	1
390260	rPt-390260	390260_con	1
390261	rPt-390261	390261	1
390262	rPt-390262	390262	1
390263	rPt-390263	506395_con	1
390264	rPt-390264	390264_con	1
390267	rPt-390267	390267	1
390268	rPt-390268	390268	1
390272	rPt-390272	390272_con	1
390275	rPt-390275	390275	1
390276	rPt-390276	390276_con	1
390278	rPt-390278	401116_con	1
390279	rPt-390279	390279	1
390281	rPt-390281	390281	1
390283	rPt-390283	390283	1
390285	rPt-390285	390077_con	1
390286	rPt-390286	390286	1
390292	rPt-390292	390292	1
390294	rPt-390294	390294	1
390296	rPt-390296	401723_con	1
390297	rPt-390297	390297	1
390298	rPt-390298	347128_con	1
390307	rPt-390307	390307	1
390310	rPt-390310	389771_con	1
390311	rPt-390311	390311	1
390313	rPt-390313	390313	1
390314	rPt-390314	506238_con	1
390317	rPt-390317	390317	1
390318	rPt-390318	508726_con	1
390320	rPt-390320	390320	1
390321	rPt-390321	390321_con	1
390324	rPt-390324	390324	1
390325	rPt-390325	390325	1
390326	rPt-390326	390326	1
390328	rPt-390328	390328	1
390330	rPt-390330	390330	1
390331	rPt-390331	390331_con	1
390333	rPt-390333	401699_con	1
390335	rPt-390335	390335	1
390336	rPt-390336	390336_con	1
390337	rPt-390337	390337_con	1
390338	rPt-390338	389446_con	1
390341	rPt-390341	390341_con	1
390344	rPt-390344	390344_con	1
390345	rPt-390345	508406_con	1
390348	rPt-390348	508292_con	1
390351	rPt-390351	390152_con	1
390357	rPt-390357	390357_con	1
390358	rPt-390358	390358	1
390359	rPt-390359	390359	1
390360	rPt-390360	390360	1
390361	rPt-390361	411058_con	1
390362	rPt-390362	390362	1
390364	rPt-390364	390364_con	1
390368	rPt-390368	390368	1
390369	rPt-390369	390369	1
390373	rPt-390373	389266_con	1
390375	rPt-390375	509303_con	1
390378	rPt-390378	347856_con	1
390380	rPt-390380	390380_con	1
390381	rPt-390381	402041_con	1
390382	rPt-390382	390382_con	1
390384	rPt-390384	390384_con	1
390385	rPt-390385	400876_con	1
390387	rPt-390387	389951_con	1
390389	rPt-390389	390331_con	1
390392	rPt-390392	390392	1
390395	rPt-390395	389266_con	1
390396	rPt-390396	390396_con	1
390397	rPt-390397	390397	1
390398	rPt-390398	390398	1
390402	rPt-390402	390402	1
390404	rPt-390404	390404	1
390406	rPt-390406	390406_con	1
390407	rPt-390407	401436_con	1
390408	rPt-390408	507432_con	1
390409	rPt-390409	390409_con	1
390410	rPt-390410	390410_con	1
390413	rPt-390413	390413	1
390416	rPt-390416	507588_con	1
390417	rPt-390417	390417	1
390418	rPt-390418	390418	1
390419	rPt-390419	390419	1
390420	rPt-390420	390420	1
390421	rPt-390421	401284_con	1
390422	rPt-390422	390422_con	1
390423	rPt-390423	390423	1
390424	rPt-390424	390424	1
390426	rPt-390426	390426_con	1
390427	rPt-390427	390427	1
390428	rPt-390428	389973_con	1
390429	rPt-390429	509384_con	1
390430	rPt-390430	349394_con	1
390433	rPt-390433	389255_con	1
390435	rPt-390435	390435_con	1
390436	rPt-390436	390436	1
390440	rPt-390440	390440_con	1
390442	rPt-390442	390442_con	1
390443	rPt-390443	390443	1
390444	rPt-390444	401261_con	1
390446	rPt-390446	390446	1
390448	rPt-390448	346960_con	1
390449	rPt-390449	390449_con	1
390451	rPt-390451	390451_con	1
390454	rPt-390454	390454_con	1
390456	rPt-390456	390456	1
390457	rPt-390457	390457	1
390464	rPt-390464	390464_con	1
390465	rPt-390465	390465	1
390466	rPt-390466	390466	1
390468	rPt-390468	390468	1
390469	rPt-390469	507502_con	1
390471	rPt-390471	390471_con	1
390476	rPt-390476	390476	1
390483	rPt-390483	390483	1
390484	rPt-390484	508372_con	1
390487	rPt-390487	390487_con	1
390497	rPt-390497	390497	1
390498	rPt-390498	390498	1
390500	rPt-390500	390500	1
390501	rPt-390501	390501_con	1
390504	rPt-390504	390504	1
390505	rPt-390505	390505	1
390506	rPt-390506	390506	1
390509	rPt-390509	390509	1
390510	rPt-390510	390510	1
390512	rPt-390512	390512_con	1
390516	rPt-390516	390516	1
390517	rPt-390517	390517	1
390520	rPt-390520	506505_con	1
390522	rPt-390522	390522	1
390525	rPt-390525	390525	1
390526	rPt-390526	390526_con	1
390527	rPt-390527	390527_con	1
390530	rPt-390530	505357_con	1
390532	rPt-390532	390532_con	1
390533	rPt-390533	390533	1
390536	rPt-390536	390536_con	1
390537	rPt-390537	390537	1
390538	rPt-390538	390538	1
390540	rPt-390540	390540	1
390546	rPt-390546	390101_con	1
390549	rPt-390549	390549	1
390550	rPt-390550	402159_con	1
390551	rPt-390551	390551_con	1
390553	rPt-390553	389907_con	1
390554	rPt-390554	390674_con	1
390556	rPt-390556	390556	1
390557	rPt-390557	390557	1
390559	rPt-390559	390559	1
390563	rPt-390563	390563	1
390564	rPt-390564	390564_con	1
390565	rPt-390565	400877_con	1
390566	rPt-390566	390566	1
390567	rPt-390567	410782_con	1
390568	rPt-390568	410863_con	1
390569	rPt-390569	390569_con	1
390571	rPt-390571	390512_con	1
390574	rPt-390574	390574	1
390575	rPt-390575	390575	1
390576	rPt-390576	390576	1
390577	rPt-390577	402232_con	1
390579	rPt-390579	509472_con	1
390580	rPt-390580	390580_con	1
390585	rPt-390585	411522_con	1
390586	rPt-390586	390586	1
390587	rPt-390587	390587	1
390590	rPt-390590	411349_con	1
390593	rPt-390593	390593	1
390594	rPt-390594	400263_con	1
390595	rPt-390595	390595	1
390596	rPt-390596	390152_con	1
390597	rPt-390597	390597	1
390598	rPt-390598	390598	1
390601	rPt-390601	390601	1
390603	rPt-390603	509721_con	1
390605	rPt-390605	390605	1
390606	rPt-390606	390606	1
390611	rPt-390611	390611	1
390612	rPt-390612	507074_con	1
390613	rPt-390613	390613	1
390614	rPt-390614	390614	1
390616	rPt-390616	390616	1
390618	rPt-390618	390618	1
390619	rPt-390619	390619	1
390623	rPt-390623	390623	1
390625	rPt-390625	390625	1
390626	rPt-390626	509522_con	1
390627	rPt-390627	390627	1
390628	rPt-390628	390628	1
390630	rPt-390630	390630	1
390633	rPt-390633	390633_con	1
390636	rPt-390636	390636	1
390637	rPt-390637	390637	1
390638	rPt-390638	390638_con	1
390641	rPt-390641	401965_con	1
390642	rPt-390642	390642	1
390646	rPt-390646	390646	1
390647	rPt-390647	390647	1
390649	rPt-390649	390649	1
390650	rPt-390650	505739_con	1
390653	rPt-390653	410871_con	1
390654	rPt-390654	390654	1
390655	rPt-390655	390655_con	1
390656	rPt-390656	399931_con	1
390657	rPt-390657	402537_con	1
390658	rPt-390658	400480_con	1
390662	rPt-390662	509522_con	1
390663	rPt-390663	390663	1
390665	rPt-390665	507395_con	1
390668	rPt-390668	509472_con	1
390669	rPt-390669	390669	1
390670	rPt-390670	390670	1
390674	rPt-390674	390674_con	1
390677	rPt-390677	390677	1
390679	rPt-390679	390679_con	1
390680	rPt-390680	506962_con	1
390681	rPt-390681	390681_con	1
390684	rPt-390684	390684_con	1
390685	rPt-390685	390685	1
390686	rPt-390686	509205_con	1
390687	rPt-390687	390687	1
390688	rPt-390688	390688	1
390690	rPt-390690	505895_con	1
390694	rPt-390694	508643_con	1
390695	rPt-390695	506954_con	1
390696	rPt-390696	401658_con	1
390697	rPt-390697	401906_con	1
390698	rPt-390698	390698	1
390710	rPt-390710	508618_con	1
390711	rPt-390711	505332_con	1
390712	rPt-390712	411149_con	1
390717	rPt-390717	389266_con	1
390719	rPt-390719	390719	1
390721	rPt-390721	390721_con	1
390722	rPt-390722	390722_con	1
390724	rPt-390724	390724	1
390725	rPt-390725	390725	1
390726	rPt-390726	390726_con	1
390727	rPt-390727	390727	1
390730	rPt-390730	390730	1
390734	rPt-390734	390734_con	1
390735	rPt-390735	390735	1
390736	rPt-390736	390736	1
390738	rPt-390738	390738	1
390741	rPt-390741	399654_con	1
390743	rPt-390743	390743_con	1
390744	rPt-390744	390744	1
390749	rPt-390749	507084_con	1
390750	rPt-390750	509391_con	1
390751	rPt-390751	390751	1
390755	rPt-390755	402599_con	1
390757	rPt-390757	509222_con	1
390758	rPt-390758	390758_con	1
390761	rPt-390761	390761_con	1
390763	rPt-390763	390763	1
390764	rPt-390764	390764_con	1
390766	rPt-390766	390766	1
390767	rPt-390767	390767	1
390768	rPt-390768	390768	1
390773	rPt-390773	390773	1
390776	rPt-390776	119594_con	1
390777	rPt-390777	390777	1
390780	rPt-390780	411025_con	1
390781	rPt-390781	390781	1
390782	rPt-390782	390782	1
390784	rPt-390784	398649_con	1
390787	rPt-390787	390787_con	1
390788	rPt-390788	390788	1
390789	rPt-390789	390789	1
398472	rPt-398472	398472	1
398474	rPt-398474	401026_con	1
398476	rPt-398476	398476	1
398478	rPt-398478	398478	1
398479	rPt-398479	398479	1
398480	rPt-398480	398480	1
398483	rPt-398483	398483_con	1
398484	rPt-398484	402314_con	1
398486	rPt-398486	398486	1
398487	rPt-398487	509509_con	1
398489	rPt-398489	411174_con	1
398494	rPt-398494	390384_con	1
398495	rPt-398495	398495_con	1
398497	rPt-398497	398497	1
398498	rPt-398498	398498	1
398499	rPt-398499	398499	1
398501	rPt-398501	398501	1
398502	rPt-398502	398502	1
398503	rPt-398503	506954_con	1
398504	rPt-398504	505760_con	1
398506	rPt-398506	390260_con	1
398507	rPt-398507	505895_con	1
398508	rPt-398508	506894_con	1
398509	rPt-398509	411479_con	1
398510	rPt-398510	398510	1
398512	rPt-398512	398512_con	1
398517	rPt-398517	398517	1
398519	rPt-398519	398519	1
398523	rPt-398523	398523	1
398524	rPt-398524	400786_con	1
398525	rPt-398525	398525	1
398526	rPt-398526	389946_con	1
398528	rPt-398528	508913_con	1
398534	rPt-398534	398534_con	1
398535	rPt-398535	398535	1
398536	rPt-398536	398536	1
398537	rPt-398537	398534_con	1
398539	rPt-398539	398539_con	1
398541	rPt-398541	398541_con	1
398542	rPt-398542	398542	1
398543	rPt-398543	398543	1
398545	rPt-398545	508762_con	1
398549	rPt-398549	398549_con	1
398551	rPt-398551	509249_con	1
398553	rPt-398553	398553	1
398554	rPt-398554	398554	1
398555	rPt-398555	398555	1
398556	rPt-398556	398556	1
398558	rPt-398558	398558	1
398562	rPt-398562	398562	1
398566	rPt-398566	398566_con	1
398567	rPt-398567	398567	1
398571	rPt-398571	506466_con	1
398572	rPt-398572	398572	1
398573	rPt-398573	398573	1
398576	rPt-398576	401221_con	1
398577	rPt-398577	398577_con	1
398579	rPt-398579	398579	1
398580	rPt-398580	398580_con	1
398583	rPt-398583	398583	1
398585	rPt-398585	346969_con	1
398587	rPt-398587	398587	1
398591	rPt-398591	506437_con	1
398593	rPt-398593	400358_con	1
398598	rPt-398598	398598	1
398599	rPt-398599	398599	1
398602	rPt-398602	505810_con	1
398612	rPt-398612	398612_con	1
398616	rPt-398616	400358_con	1
398617	rPt-398617	506154_con	1
398618	rPt-398618	398618	1
398619	rPt-398619	398619_con	1
398622	rPt-398622	400235_con	1
398625	rPt-398625	398625	1
398626	rPt-398626	505921_con	1
398627	rPt-398627	398627_con	1
398629	rPt-398629	398629_con	1
398631	rPt-398631	400250_con	1
398632	rPt-398632	398632	1
398633	rPt-398633	398633	1
398634	rPt-398634	398634	1
398635	rPt-398635	400974_con	1
398636	rPt-398636	398636_con	1
398637	rPt-398637	398637	1
398641	rPt-398641	398641	1
398644	rPt-398644	398644	1
398649	rPt-398649	398649_con	1
398650	rPt-398650	398650_con	1
398651	rPt-398651	398651_con	1
398652	rPt-398652	398652	1
398653	rPt-398653	398653_con	1
398654	rPt-398654	506852_con	1
398656	rPt-398656	402159_con	1
398657	rPt-398657	390009_con	1
398658	rPt-398658	398658	1
398660	rPt-398660	398660	1
398666	rPt-398666	389515_con	1
398667	rPt-398667	389268_con	1
398668	rPt-398668	505512_con	1
398672	rPt-398672	402657_con	1
398678	rPt-398678	398678	1
398680	rPt-398680	509329_con	1
398681	rPt-398681	398681_con	1
398688	rPt-398688	389317_con	1
398689	rPt-398689	402408_con	1
398690	rPt-398690	401146_con	1
398691	rPt-398691	507961_con	1
398692	rPt-398692	398692_con	1
398694	rPt-398694	398694	1
398695	rPt-398695	389652_con	1
398697	rPt-398697	398697_con	1
398698	rPt-398698	506271_con	1
398699	rPt-398699	398699	1
398700	rPt-398700	398700	1
398702	rPt-398702	398702	1
398703	rPt-398703	398703	1
398705	rPt-398705	398705_con	1
398706	rPt-398706	398706	1
398708	rPt-398708	398708_con	1
398711	rPt-398711	390787_con	1
398714	rPt-398714	505618_con	1
398715	rPt-398715	402207_con	1
398716	rPt-398716	398716_con	1
398717	rPt-398717	398717	1
398718	rPt-398718	398718_con	1
398719	rPt-398719	398719	1
398720	rPt-398720	398720	1
398722	rPt-398722	507321_con	1
398724	rPt-398724	398724_con	1
398725	rPt-398725	398725_con	1
398726	rPt-398726	398726	1
398729	rPt-398729	389952_con	1
398730	rPt-398730	411391_con	1
398731	rPt-398731	508235_con	1
398733	rPt-398733	508352_con	1
398734	rPt-398734	398734_con	1
398735	rPt-398735	398735	1
398737	rPt-398737	506794_con	1
398738	rPt-398738	398738	1
398739	rPt-398739	349394_con	1
398744	rPt-398744	400018_con	1
398747	rPt-398747	398747	1
398748	rPt-398748	508656_con	1
398750	rPt-398750	402616_con	1
398753	rPt-398753	508380_con	1
398754	rPt-398754	505760_con	1
398757	rPt-398757	400820_con	1
398758	rPt-398758	389317_con	1
398759	rPt-398759	398759	1
398761	rPt-398761	398761	1
398762	rPt-398762	402259_con	1
398763	rPt-398763	390787_con	1
398764	rPt-398764	398764	1
398765	rPt-398765	398765_con	1
398766	rPt-398766	398766	1
398767	rPt-398767	390260_con	1
398768	rPt-398768	398768	1
398769	rPt-398769	508643_con	1
398772	rPt-398772	506011_con	1
398773	rPt-398773	398827_con	1
398776	rPt-398776	398776	1
398777	rPt-398777	509306_con	1
398778	rPt-398778	398778	1
398781	rPt-398781	398781_con	1
398783	rPt-398783	398783	1
398784	rPt-398784	398784_con	1
398786	rPt-398786	398786_con	1
398788	rPt-398788	398788_con	1
398791	rPt-398791	398791	1
398792	rPt-398792	398792_con	1
398794	rPt-398794	398794	1
398795	rPt-398795	398795	1
398796	rPt-398796	398796_con	1
398797	rPt-398797	507459_con	1
398798	rPt-398798	348507_con	1
398800	rPt-398800	398800_con	1
398801	rPt-398801	398801	1
398802	rPt-398802	398802	1
398805	rPt-398805	398805	1
398807	rPt-398807	398807	1
398810	rPt-398810	398810	1
398811	rPt-398811	398811	1
398812	rPt-398812	401173_con	1
398813	rPt-398813	398813_con	1
398814	rPt-398814	398814	1
398815	rPt-398815	398815	1
398816	rPt-398816	509205_con	1
398817	rPt-398817	398817	1
398818	rPt-398818	505348_con	1
398819	rPt-398819	398819	1
398820	rPt-398820	410972_con	1
398822	rPt-398822	399743_con	1
398823	rPt-398823	398823	1
398824	rPt-398824	398851_con	1
398825	rPt-398825	390569_con	1
398827	rPt-398827	398827_con	1
398830	rPt-398830	401744_con	1
398831	rPt-398831	398831	1
398832	rPt-398832	389266_con	1
398834	rPt-398834	398834_con	1
398835	rPt-398835	398835	1
398836	rPt-398836	398836_con	1
398837	rPt-398837	398837	1
398838	rPt-398838	398838_con	1
398841	rPt-398841	398841_con	1
398842	rPt-398842	398842	1
398845	rPt-398845	402133_con	1
398848	rPt-398848	401085_con	1
398849	rPt-398849	398849_con	1
398851	rPt-398851	398851_con	1
398853	rPt-398853	508351_con	1
399240	rPt-399240	402448_con	1
399242	rPt-399242	399242	1
399245	rPt-399245	390337_con	1
399249	rPt-399249	399249	1
399253	rPt-399253	399253_con	1
399254	rPt-399254	399254	1
399258	rPt-399258	399258_con	1
399259	rPt-399259	399259	1
399261	rPt-399261	399261_con	1
399263	rPt-399263	507527_con	1
399264	rPt-399264	347969_con	1
399265	rPt-399265	399265_con	1
399268	rPt-399268	399268	1
399269	rPt-399269	399269	1
399270	rPt-399270	390440_con	1
399271	rPt-399271	401974_con	1
399272	rPt-399272	399272	1
399275	rPt-399275	399275	1
399278	rPt-399278	399278_con	1
399279	rPt-399279	399279	1
399280	rPt-399280	399280	1
399281	rPt-399281	399281	1
399286	rPt-399286	399286_con	1
399290	rPt-399290	410845_con	1
399292	rPt-399292	508380_con	1
399295	rPt-399295	399295	1
399296	rPt-399296	399296_con	1
399297	rPt-399297	399297_con	1
399301	rPt-399301	505949_con	1
399303	rPt-399303	411226_con	1
399304	rPt-399304	509468_con	1
399305	rPt-399305	399323_con	1
399306	rPt-399306	401974_con	1
399307	rPt-399307	399307_con	1
399308	rPt-399308	411393_con	1
399310	rPt-399310	399310_con	1
399311	rPt-399311	399311_con	1
399312	rPt-399312	400425_con	1
399313	rPt-399313	390161_con	1
399316	rPt-399316	399316	1
399317	rPt-399317	505618_con	1
399319	rPt-399319	399319_con	1
399321	rPt-399321	390077_con	1
399323	rPt-399323	399323_con	1
399325	rPt-399325	399325	1
399329	rPt-399329	507991_con	1
399333	rPt-399333	399333	1
399336	rPt-399336	402140_con	1
399338	rPt-399338	399338	1
399339	rPt-399339	399339	1
399340	rPt-399340	401932_con	1
399341	rPt-399341	390158_con	1
399348	rPt-399348	508497_con	1
399351	rPt-399351	399351_con	1
399352	rPt-399352	399352_con	1
399353	rPt-399353	399353	1
399358	rPt-399358	399358_con	1
399361	rPt-399361	389777_con	1
399365	rPt-399365	400981_con	1
399368	rPt-399368	399368_con	1
399371	rPt-399371	401976_con	1
399377	rPt-399377	399377_con	1
399378	rPt-399378	399378	1
399379	rPt-399379	399379_con	1
399381	rPt-399381	399381_con	1
399382	rPt-399382	399382	1
399386	rPt-399386	399386	1
399387	rPt-399387	399387_con	1
399388	rPt-399388	390734_con	1
399390	rPt-399390	508424_con	1
399391	rPt-399391	399391_con	1
399394	rPt-399394	399286_con	1
399396	rPt-399396	399396	1
399397	rPt-399397	506375_con	1
399398	rPt-399398	399398_con	1
399399	rPt-399399	389311_con	1
399402	rPt-399402	506501_con	1
399406	rPt-399406	399406	1
399409	rPt-399409	389266_con	1
399410	rPt-399410	401853_con	1
399411	rPt-399411	398784_con	1
399413	rPt-399413	411159_con	1
399416	rPt-399416	399416_con	1
399420	rPt-399420	401402_con	1
399421	rPt-399421	399421	1
399423	rPt-399423	399423	1
399424	rPt-399424	399424	1
399425	rPt-399425	411274_con	1
399426	rPt-399426	398612_con	1
399427	rPt-399427	390501_con	1
399429	rPt-399429	399429_con	1
399431	rPt-399431	399431	1
399432	rPt-399432	399432	1
399434	rPt-399434	399434	1
399435	rPt-399435	410782_con	1
399442	rPt-399442	399442	1
399445	rPt-399445	400210_con	1
399452	rPt-399452	399452_con	1
399462	rPt-399462	399462	1
399467	rPt-399467	399467	1
399468	rPt-399468	401029_con	1
399470	rPt-399470	401976_con	1
399475	rPt-399475	389946_con	1
399477	rPt-399477	398718_con	1
399478	rPt-399478	507074_con	1
399481	rPt-399481	399481	1
399482	rPt-399482	399387_con	1
399485	rPt-399485	399485	1
399487	rPt-399487	400263_con	1
399488	rPt-399488	398827_con	1
399489	rPt-399489	399489	1
399497	rPt-399497	399497_con	1
399498	rPt-399498	399498_con	1
399502	rPt-399502	399502	1
399503	rPt-399503	399873_con	1
399505	rPt-399505	399505_con	1
399506	rPt-399506	399497_con	1
399512	rPt-399512	401850_con	1
399514	rPt-399514	399514	1
399515	rPt-399515	399515_con	1
399516	rPt-399516	399516	1
399518	rPt-399518	399518	1
399519	rPt-399519	399519_con	1
399520	rPt-399520	411479_con	1
399521	rPt-399521	401286_con	1
399525	rPt-399525	399525	1
399529	rPt-399529	399529	1
399531	rPt-399531	399531_con	1
399537	rPt-399537	410782_con	1
399539	rPt-399539	399539	1
399540	rPt-399540	399540_con	1
399541	rPt-399541	399541_con	1
399543	rPt-399543	507388_con	1
399547	rPt-399547	399547	1
399549	rPt-399549	399549_con	1
399551	rPt-399551	399551	1
399554	rPt-399554	399554	1
399555	rPt-399555	399555	1
399559	rPt-399559	399559_con	1
399560	rPt-399560	399560	1
399561	rPt-399561	505332_con	1
399563	rPt-399563	399563_con	1
399564	rPt-399564	399826_con	1
399565	rPt-399565	399565	1
399567	rPt-399567	506869_con	1
399568	rPt-399568	399568	1
399569	rPt-399569	389317_con	1
399570	rPt-399570	399570	1
399573	rPt-399573	399573	1
399574	rPt-399574	399574_con	1
399575	rPt-399575	399575_con	1
399577	rPt-399577	399577	1
399579	rPt-399579	400609_con	1
399580	rPt-399580	399930_con	1
399581	rPt-399581	401049_con	1
399587	rPt-399587	347048_con	1
399588	rPt-399588	399588_con	1
399589	rPt-399589	399589_con	1
399592	rPt-399592	399592	1
399593	rPt-399593	399593	1
399594	rPt-399594	508351_con	1
399597	rPt-399597	389718_con	1
399600	rPt-399600	505201_con	1
399603	rPt-399603	399603_con	1
399606	rPt-399606	399606	1
399607	rPt-399607	399607	1
399609	rPt-399609	508914_con	1
399610	rPt-399610	508312_con	1
399613	rPt-399613	402420_con	1
399614	rPt-399614	410832_con	1
399617	rPt-399617	506531_con	1
399621	rPt-399621	399621	1
399626	rPt-399626	399626	1
399627	rPt-399627	399627_con	1
399628	rPt-399628	506740_con	1
399629	rPt-399629	399629	1
399632	rPt-399632	398705_con	1
399633	rPt-399633	399633	1
399635	rPt-399635	399635	1
399636	rPt-399636	509509_con	1
399638	rPt-399638	507961_con	1
399639	rPt-399639	399639_con	1
399641	rPt-399641	399641_con	1
399642	rPt-399642	507970_con	1
399644	rPt-399644	401146_con	1
399648	rPt-399648	399648	1
399649	rPt-399649	399649	1
399650	rPt-399650	507439_con	1
399651	rPt-399651	399651	1
399653	rPt-399653	399653	1
399654	rPt-399654	399654_con	1
399656	rPt-399656	506011_con	1
399658	rPt-399658	399658	1
399659	rPt-399659	401879_con	1
399661	rPt-399661	399661	1
399662	rPt-399662	399662_con	1
399663	rPt-399663	399663	1
399664	rPt-399664	508380_con	1
399665	rPt-399665	399665	1
399666	rPt-399666	508687_con	1
399667	rPt-399667	399667	1
399669	rPt-399669	399669	1
399673	rPt-399673	399673	1
399677	rPt-399677	399677_con	1
399678	rPt-399678	389839_con	1
399680	rPt-399680	399680_con	1
399681	rPt-399681	399681	1
399682	rPt-399682	399682	1
399683	rPt-399683	401851_con	1
399684	rPt-399684	399684	1
399685	rPt-399685	509472_con	1
399686	rPt-399686	401808_con	1
399689	rPt-399689	399689	1
399691	rPt-399691	509143_con	1
399692	rPt-399692	399692	1
399693	rPt-399693	399935_con	1
399694	rPt-399694	506767_con	1
399696	rPt-399696	390321_con	1
399698	rPt-399698	508099_con	1
399699	rPt-399699	402537_con	1
399701	rPt-399701	399701_con	1
399703	rPt-399703	506684_con	1
399705	rPt-399705	401658_con	1
399706	rPt-399706	399706_con	1
399707	rPt-399707	399707_con	1
399708	rPt-399708	389319_con	1
399710	rPt-399710	506374_con	1
399714	rPt-399714	399714	1
399715	rPt-399715	399715	1
399716	rPt-399716	400358_con	1
399717	rPt-399717	399717_con	1
399721	rPt-399721	411066_con	1
399723	rPt-399723	390272_con	1
399724	rPt-399724	399724	1
399726	rPt-399726	399726	1
399730	rPt-399730	389856_con	1
399731	rPt-399731	399731	1
399732	rPt-399732	399627_con	1
399735	rPt-399735	399735	1
399736	rPt-399736	399736	1
399740	rPt-399740	508187_con	1
399742	rPt-399742	399742_con	1
399743	rPt-399743	399743_con	1
399745	rPt-399745	389973_con	1
399747	rPt-399747	399747_con	1
399748	rPt-399748	411238_con	1
399750	rPt-399750	399750	1
399753	rPt-399753	398781_con	1
399754	rPt-399754	507905_con	1
399755	rPt-399755	509735_con	1
399758	rPt-399758	399758	1
399760	rPt-399760	399760	1
399761	rPt-399761	399761	1
399763	rPt-399763	399763	1
399764	rPt-399764	508508_con	1
399769	rPt-399769	401574_con	1
399771	rPt-399771	399771	1
399772	rPt-399772	399772_con	1
399773	rPt-399773	399773	1
399774	rPt-399774	399774_con	1
399775	rPt-399775	505523_con	1
399776	rPt-399776	398580_con	1
399777	rPt-399777	399777	1
399783	rPt-399783	509064_con	1
399784	rPt-399784	389322_con	1
399786	rPt-399786	399786	1
399788	rPt-399788	399788_con	1
399789	rPt-399789	347184_con	1
399791	rPt-399791	399791_con	1
399792	rPt-399792	399792_con	1
399793	rPt-399793	410827_con	1
399794	rPt-399794	389659_con	1
399797	rPt-399797	399797_con	1
399800	rPt-399800	507714_con	1
399801	rPt-399801	401353_con	1
399802	rPt-399802	399802	1
399803	rPt-399803	399803	1
399804	rPt-399804	507322_con	1
399805	rPt-399805	402679_con	1
399809	rPt-399809	400488_con	1
399811	rPt-399811	398619_con	1
399813	rPt-399813	399813	1
399818	rPt-399818	389808_con	1
399821	rPt-399821	399821_con	1
399824	rPt-399824	410871_con	1
399825	rPt-399825	507589_con	1
399826	rPt-399826	399826_con	1
399827	rPt-399827	410892_con	1
399828	rPt-399828	399706_con	1
399829	rPt-399829	400836_con	1
399830	rPt-399830	399627_con	1
399831	rPt-399831	399831_con	1
399832	rPt-399832	507600_con	1
399834	rPt-399834	390083_con	1
399839	rPt-399839	399839	1
399840	rPt-399840	399840_con	1
399841	rPt-399841	400708_con	1
399842	rPt-399842	505717_con	1
399845	rPt-399845	399845	1
399846	rPt-399846	399846_con	1
399848	rPt-399848	399848	1
399849	rPt-399849	399849_con	1
399854	rPt-399854	410827_con	1
399855	rPt-399855	399855	1
399856	rPt-399856	399856	1
399857	rPt-399857	410821_con	1
399858	rPt-399858	399858	1
399859	rPt-399859	401327_con	1
399869	rPt-399869	401239_con	1
399870	rPt-399870	399870	1
399873	rPt-399873	399873_con	1
399876	rPt-399876	399876_con	1
399877	rPt-399877	399877	1
399878	rPt-399878	399878	1
399879	rPt-399879	507589_con	1
399882	rPt-399882	399882	1
399884	rPt-399884	399884	1
399885	rPt-399885	400270_con	1
399886	rPt-399886	399886	1
399887	rPt-399887	399887	1
399888	rPt-399888	399888_con	1
399892	rPt-399892	399892	1
399893	rPt-399893	399893	1
399895	rPt-399895	399895	1
399896	rPt-399896	399896	1
399897	rPt-399897	399897	1
399898	rPt-399898	410849_con	1
399900	rPt-399900	399900	1
399902	rPt-399902	402215_con	1
399903	rPt-399903	507388_con	1
399904	rPt-399904	389808_con	1
399906	rPt-399906	389466_con	1
399909	rPt-399909	507340_con	1
399916	rPt-399916	399916_con	1
399917	rPt-399917	399935_con	1
399919	rPt-399919	390220_con	1
399920	rPt-399920	402411_con	1
399921	rPt-399921	390580_con	1
399922	rPt-399922	399922	1
399926	rPt-399926	399926	1
399928	rPt-399928	399928	1
399929	rPt-399929	399929	1
399930	rPt-399930	399930_con	1
399931	rPt-399931	399931_con	1
399933	rPt-399933	505250_con	1
399935	rPt-399935	399935_con	1
399937	rPt-399937	399937_con	1
399938	rPt-399938	389933_con	1
399939	rPt-399939	399398_con	1
399942	rPt-399942	400018_con	1
399944	rPt-399944	398784_con	1
399945	rPt-399945	401941_con	1
399946	rPt-399946	399946	1
399947	rPt-399947	399947	1
399948	rPt-399948	399948	1
399949	rPt-399949	347587_con	1
399953	rPt-399953	390260_con	1
399954	rPt-399954	399954_con	1
399959	rPt-399959	399959	1
399960	rPt-399960	390077_con	1
399964	rPt-399964	509463_con	1
399965	rPt-399965	402429_con	1
399967	rPt-399967	399563_con	1
399968	rPt-399968	399968_con	1
399969	rPt-399969	399969	1
399972	rPt-399972	399972	1
399973	rPt-399973	399973_con	1
399975	rPt-399975	399975_con	1
399978	rPt-399978	399968_con	1
399979	rPt-399979	505323_con	1
399980	rPt-399980	399980	1
399983	rPt-399983	508142_con	1
399984	rPt-399984	390233_con	1
399985	rPt-399985	399985	1
399986	rPt-399986	399986_con	1
399987	rPt-399987	399987	1
399989	rPt-399989	399989_con	1
399990	rPt-399990	400235_con	1
399991	rPt-399991	390337_con	1
399992	rPt-399992	399992_con	1
399994	rPt-399994	399994_con	1
399996	rPt-399996	399996_con	1
399998	rPt-399998	399998	1
399999	rPt-399999	401046_con	1
400003	rPt-400003	400003	1
400004	rPt-400004	399559_con	1
400005	rPt-400005	400819_con	1
400008	rPt-400008	400008	1
400009	rPt-400009	410863_con	1
400010	rPt-400010	507438_con	1
400013	rPt-400013	389851_con	1
400014	rPt-400014	400014_con	1
400015	rPt-400015	400015_con	1
400016	rPt-400016	400016_con	1
400018	rPt-400018	400018_con	1
400020	rPt-400020	389858_con	1
400021	rPt-400021	400021	1
400023	rPt-400023	400023	1
400025	rPt-400025	402680_con	1
400030	rPt-400030	400030_con	1
400032	rPt-400032	400032	1
400033	rPt-400033	400033_con	1
400035	rPt-400035	399994_con	1
400036	rPt-400036	400036	1
400038	rPt-400038	400038	1
400040	rPt-400040	400040	1
400042	rPt-400042	400042_con	1
400043	rPt-400043	402491_con	1
400044	rPt-400044	400044	1
400045	rPt-400045	400045	1
400046	rPt-400046	400187_con	1
400050	rPt-400050	400050	1
400051	rPt-400051	400051	1
400052	rPt-400052	400052	1
400053	rPt-400053	399831_con	1
400054	rPt-400054	400054_con	1
400057	rPt-400057	400057	1
400058	rPt-400058	400058_con	1
400060	rPt-400060	390337_con	1
400061	rPt-400061	508380_con	1
400063	rPt-400063	400063	1
400064	rPt-400064	399387_con	1
400068	rPt-400068	398725_con	1
400069	rPt-400069	400069	1
400070	rPt-400070	399387_con	1
400072	rPt-400072	507448_con	1
400073	rPt-400073	400073	1
400074	rPt-400074	400074	1
400075	rPt-400075	400075	1
400077	rPt-400077	400077	1
400078	rPt-400078	400078	1
400079	rPt-400079	400079_con	1
400083	rPt-400083	400083	1
400084	rPt-400084	411293_con	1
400085	rPt-400085	400085	1
400087	rPt-400087	400087	1
400089	rPt-400089	400089	1
400090	rPt-400090	400090	1
400091	rPt-400091	399973_con	1
400093	rPt-400093	400058_con	1
400095	rPt-400095	398765_con	1
400098	rPt-400098	400098	1
400103	rPt-400103	400103	1
400106	rPt-400106	507074_con	1
400107	rPt-400107	400107	1
400108	rPt-400108	400108	1
400112	rPt-400112	400112	1
400113	rPt-400113	400113	1
400115	rPt-400115	400115	1
400116	rPt-400116	389317_con	1
400117	rPt-400117	411135_con	1
400119	rPt-400119	400119_con	1
400122	rPt-400122	400122	1
400124	rPt-400124	410824_con	1
400126	rPt-400126	400119_con	1
400127	rPt-400127	399989_con	1
400128	rPt-400128	400128	1
400130	rPt-400130	400130	1
400133	rPt-400133	400133	1
400135	rPt-400135	399840_con	1
400137	rPt-400137	400137_con	1
400138	rPt-400138	400138	1
400139	rPt-400139	400139	1
400143	rPt-400143	400143_con	1
400145	rPt-400145	400145	1
400147	rPt-400147	509020_con	1
400151	rPt-400151	400151	1
400152	rPt-400152	400152	1
400153	rPt-400153	400153_con	1
400154	rPt-400154	389699_con	1
400155	rPt-400155	400155	1
400157	rPt-400157	400157	1
400158	rPt-400158	400358_con	1
400159	rPt-400159	400159_con	1
400160	rPt-400160	400160_con	1
400162	rPt-400162	400159_con	1
400163	rPt-400163	400163	1
400164	rPt-400164	400164_con	1
400167	rPt-400167	400167_con	1
400168	rPt-400168	400168_con	1
400171	rPt-400171	400171	1
400173	rPt-400173	400173	1
400175	rPt-400175	400175	1
400177	rPt-400177	390787_con	1
400179	rPt-400179	400179_con	1
400180	rPt-400180	400245_con	1
400185	rPt-400185	507600_con	1
400187	rPt-400187	400187_con	1
400190	rPt-400190	400190_con	1
400191	rPt-400191	400191	1
400192	rPt-400192	398813_con	1
400193	rPt-400193	401261_con	1
400194	rPt-400194	400194	1
400196	rPt-400196	400196	1
400197	rPt-400197	400197	1
400199	rPt-400199	400199	1
400200	rPt-400200	400200	1
400203	rPt-400203	400179_con	1
400205	rPt-400205	400030_con	1
400209	rPt-400209	411226_con	1
400210	rPt-400210	400210_con	1
400211	rPt-400211	400358_con	1
400216	rPt-400216	401516_con	1
400217	rPt-400217	400217	1
400218	rPt-400218	400218	1
400219	rPt-400219	389391_con	1
400220	rPt-400220	410789_con	1
400221	rPt-400221	400221_con	1
400222	rPt-400222	400222	1
400223	rPt-400223	401116_con	1
400225	rPt-400225	401275_con	1
400226	rPt-400226	509725_con	1
400228	rPt-400228	400228	1
400229	rPt-400229	400229	1
400232	rPt-400232	508794_con	1
400233	rPt-400233	505416_con	1
400234	rPt-400234	400234_con	1
400235	rPt-400235	400235_con	1
400236	rPt-400236	400236_con	1
400237	rPt-400237	400237	1
400238	rPt-400238	400238	1
400239	rPt-400239	400239	1
400243	rPt-400243	400243	1
400245	rPt-400245	400245_con	1
400246	rPt-400246	400246_con	1
400250	rPt-400250	400250_con	1
400252	rPt-400252	400252	1
400253	rPt-400253	400253	1
400255	rPt-400255	390009_con	1
400256	rPt-400256	400256_con	1
400257	rPt-400257	400257_con	1
400262	rPt-400262	509523_con	1
400263	rPt-400263	400263_con	1
400264	rPt-400264	400264	1
400266	rPt-400266	400266	1
400268	rPt-400268	400268_con	1
400270	rPt-400270	400270_con	1
400273	rPt-400273	400273	1
400276	rPt-400276	389959_con	1
400278	rPt-400278	400278	1
400279	rPt-400279	400279_con	1
400281	rPt-400281	400281	1
400282	rPt-400282	400282	1
400287	rPt-400287	400287_con	1
400289	rPt-400289	398651_con	1
400290	rPt-400290	507452_con	1
400291	rPt-400291	400291_con	1
400293	rPt-400293	400293	1
400294	rPt-400294	400294_con	1
400297	rPt-400297	400297_con	1
400299	rPt-400299	400299	1
400300	rPt-400300	400300	1
400301	rPt-400301	400301	1
400302	rPt-400302	509249_con	1
400303	rPt-400303	400303	1
400308	rPt-400308	400308	1
400310	rPt-400310	402159_con	1
400312	rPt-400312	400312	1
400314	rPt-400314	506836_con	1
400315	rPt-400315	400315	1
400316	rPt-400316	400167_con	1
400317	rPt-400317	398512_con	1
400318	rPt-400318	402066_con	1
400319	rPt-400319	400319_con	1
400320	rPt-400320	400320	1
400321	rPt-400321	400321	1
400326	rPt-400326	400876_con	1
400328	rPt-400328	400328	1
400330	rPt-400330	400330_con	1
400331	rPt-400331	401043_con	1
400332	rPt-400332	400332	1
400333	rPt-400333	400333	1
400334	rPt-400334	400334	1
400336	rPt-400336	400336_con	1
400337	rPt-400337	400337	1
400338	rPt-400338	400338	1
400339	rPt-400339	507074_con	1
400340	rPt-400340	400340_con	1
400341	rPt-400341	400400_con	1
400342	rPt-400342	400342	1
400343	rPt-400343	400343	1
400344	rPt-400344	509509_con	1
400345	rPt-400345	401976_con	1
400346	rPt-400346	399873_con	1
400347	rPt-400347	389266_con	1
400348	rPt-400348	400348	1
400354	rPt-400354	505546_con	1
400358	rPt-400358	400358_con	1
400359	rPt-400359	399916_con	1
400361	rPt-400361	400361	1
400363	rPt-400363	400363	1
400365	rPt-400365	400365_con	1
400366	rPt-400366	399916_con	1
400367	rPt-400367	389266_con	1
400368	rPt-400368	402087_con	1
400370	rPt-400370	399680_con	1
400371	rPt-400371	401699_con	1
400372	rPt-400372	508380_con	1
400373	rPt-400373	402554_con	1
400374	rPt-400374	400374	1
400377	rPt-400377	400377	1
400378	rPt-400378	400378	1
400380	rPt-400380	399992_con	1
400382	rPt-400382	402215_con	1
400383	rPt-400383	400383	1
400389	rPt-400389	410789_con	1
400390	rPt-400390	400390	1
400392	rPt-400392	390655_con	1
400393	rPt-400393	400393	1
400396	rPt-400396	400396_con	1
400397	rPt-400397	400476_con	1
400398	rPt-400398	400398_con	1
400399	rPt-400399	400399	1
400400	rPt-400400	400400_con	1
400401	rPt-400401	390464_con	1
400406	rPt-400406	400418_con	1
400407	rPt-400407	400407	1
400410	rPt-400410	506176_con	1
400411	rPt-400411	390101_con	1
400415	rPt-400415	400415	1
400416	rPt-400416	400416	1
[truncated: 4,182 more rows]
